# Supplementary material for: Neisseria conserved hypothetical protein DMP12 is a DNA mimic that binds to histone-like HU protein
Source: PubMed Central journal article supplement — Nucleic Acids Res. 2013 Mar 26;41(9):5127–38. doi: 10.1093/nar/gkt201 (PMC3643605; doi:10.1093/nar/gkt201), 2013-03-26
Supplement: supp_gkt201_nar-03107-m-2012-File011.pdf [file supp_gkt201_nar-03107-m-2012-File011.pdf]

## Supplementary data

Table S1. Protein identification by LC-nanoESI-MS/MS.

| <b>Band</b> | <b>Protein name (species)</b>                                     | <b>Acc. No.</b> | <b>MS/mps*</b> | <b>Sequence coverage</b> |
|-------------|-------------------------------------------------------------------|-----------------|----------------|--------------------------|
| 1           | Integration Host Factor Protein alpha ( <i>Escherichia coli</i> ) | 2IIE_A          | 701/22         | 54%                      |
| 2           | HU protein beta ( <i>Escherichia coli</i> )                       | NP_286182       | 656/11         | 65%                      |

\* MS/mps: Mowse Score/matched peptides.

## Supplementary Figure Legends

**Figure S1. A His-pulldown assay found interactions between DMP12 and two DNA binding proteins.** When total extracted *E.coli* proteins were used as prey, the N-terminal His<sub>10</sub>-tagged DMP12 bait pulled down two DNA binding proteins. LC-nano ESI-MS/MS identified these proteins as HU beta (HUB) and IHF alpha (Table S1 for protein details).

**Figure S2. BS3 Cross-linking assays only confirmed the interaction between DMP12 and *Neisseria* HU.** Protein-protein interactions produced a clear band only in the DMP12/HU reaction. Conversely there is no evidence for DMP12-IHF cross-linking because the faint bands in the DMP12-IHF columns are not significantly stronger than the ~ 38 kDa band in the IHF-only control. White asterisks indicate the shifted, cross-linked bands.

**Figure S3. Sedimentation velocity (SV) analysis of DMP12/*Neisseria* HU complex by analytical ultracentrifugation.** For sedimentation velocity (SV) analysis, all samples were diluted to a suitable concentration (OD 280 absorption between 0.1~0.8) using 20 mM Tris pH 7.4 buffer and 5 mM MgCl<sub>2</sub>. All analytical ultracentrifugation analyses were performed at 45000 rpm using a 4-hole AnTi60 rotor at 20 °C in a Beckman Optima XL-1 AUC equipped with absorbance optics (OD 280 nm). Data

were analyzed using the  $c(s)$  distribution of the Lamm equation solutions calculated by the program SEDFIT (<http://www.analyticalultracentrifugation.com>). The SEDFIT parameters were: buffer density 0.9988 g/ml; buffer viscosity 0.01069 poise; the protein partial specific volume was 0.73. The HYDROPRO program (20) was used to calculate the theoretical sedimentation coefficient ( $S$  value) from the proposed binding model and from the PDB coordinate files for the DMP12 and *Anabaena* HU.

(A) 10  $\mu\text{M}$  N-terminal His<sub>10</sub> tagged DMP12. Only the monomeric form could be found. The  $S$  value from the SV data (2.01) is a good match to the theoretical  $S$  value of N-terminal His<sub>10</sub> tagged DMP12 monomer, which is given by HYDROPRO as 2.0.

(B) 100  $\mu\text{M}$  C-terminal His<sub>6</sub> tagged *Neisseria* HU protein. Only the dimeric form could be found. The  $S$  value from the SV data (2.11) is close to the theoretical  $S$  value of HU dimer, given by HYDROPRO as 1.9.

(C) 10  $\mu\text{M}$  N-terminal His<sub>10</sub> tagged DMP12 and 10  $\mu\text{M}$  C-terminal His<sub>6</sub> tagged *Neisseria* HU protein. The observed  $S$  value (3.02) could only have resulted from the DMP12 monomer binding to the HU dimer form (HYDROPRO: 3.19). A full comparison of the theoretical and observed  $S$  values is given in Table 2.

**Figure S4. The DMP12 structure binds a magnesium ion.** The magnesium ion that interacts with the Asp13 of the DMP12 protein may come from the magnesium

acetate in the reservoir. This finding suggests that DMP12 may have a divalent metal ion binding activity. However, we also found that the presence or absence of magnesium did not make very much difference in our subsequent studies on HU-DMP12 interaction. More work will therefore be needed to determine the functional roles of this metal binding activity, if any.

**Figure S5. EMSA results from different concentrations of *Neisseria* HU and 2.5 nM plasmid DNA substrate.** *Neisseria* HU protein produced band shift of the plasmid DNA in a dose-dependent manner.

**Figure S6. DMP12's ability to protect *Neisseria* HU protein from trypsin digestion is dose-dependent.** The increasing molar ratios of DMP12 to 100  $\mu$ M *Neisseria* HU protein are 1:1, 2:1, 4:1, respectively. His-pulldown was used to purify the un-cleaved C-terminal tagged *Neisseria* HU protein.

**Figure S7. The expression of DMP12 increased the growth rate of *E. coli*.** (A) The cell density was monitored at OD<sub>600</sub> after the addition of 1mM IPTG. Data were obtained from three replicate experiments. The different baseline OD<sub>600</sub> values at 0 hour suggest that *E.coli* transformed with the DMP12 plasmid grows more slowly

than *E.coli* transformed with the empty pET21 plasmid. The reason for this is unknown. (B) Recombinant DMP12 expression in the soluble fraction extracted from the *E.coli* cells. The temperature used in this assay was 37 °C.

**Figure S8. Structural comparison of HI1450 and DMP12 (A), and multiple sequence alignment of HI1450 (B) and DMP12 (C) homologs in different species.**

## Supporting figures

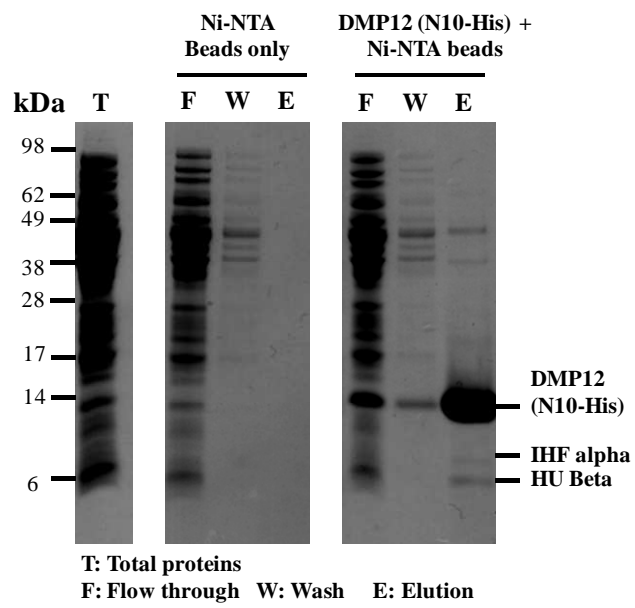

Figure S1

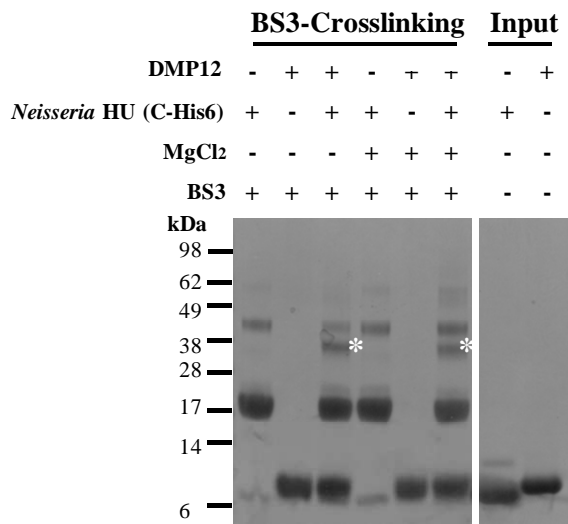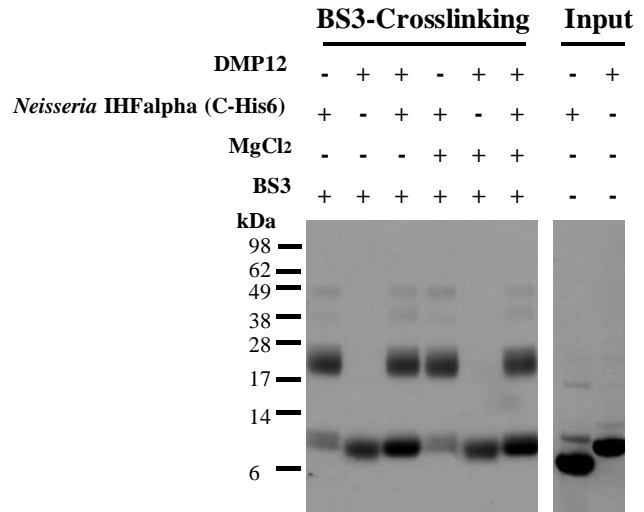

Figure S2

Figure S3 (A)

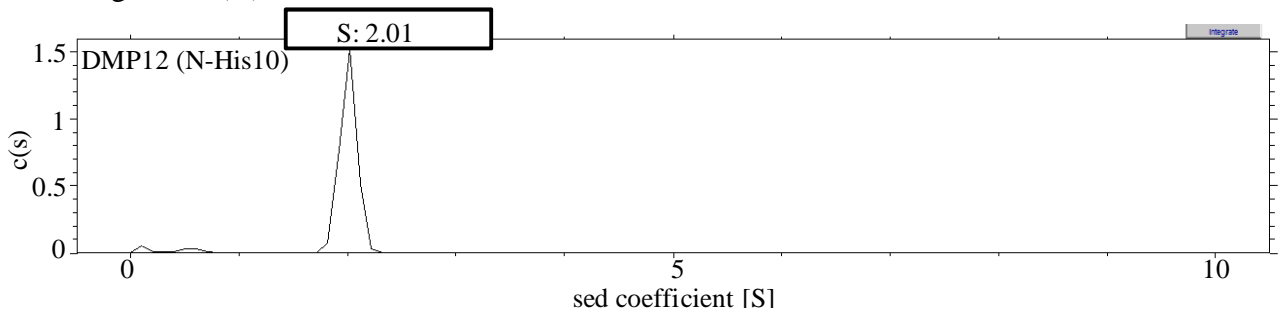

Figure S3 (B)

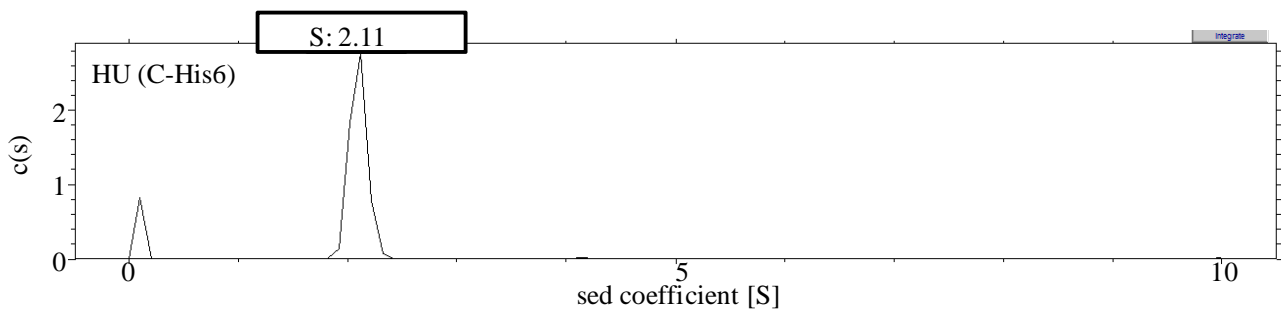

Figure S3 (C)

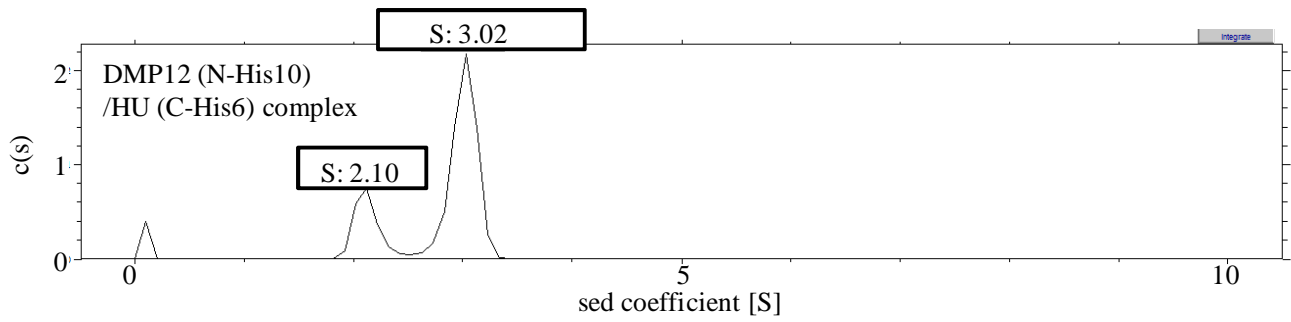

Figure S3



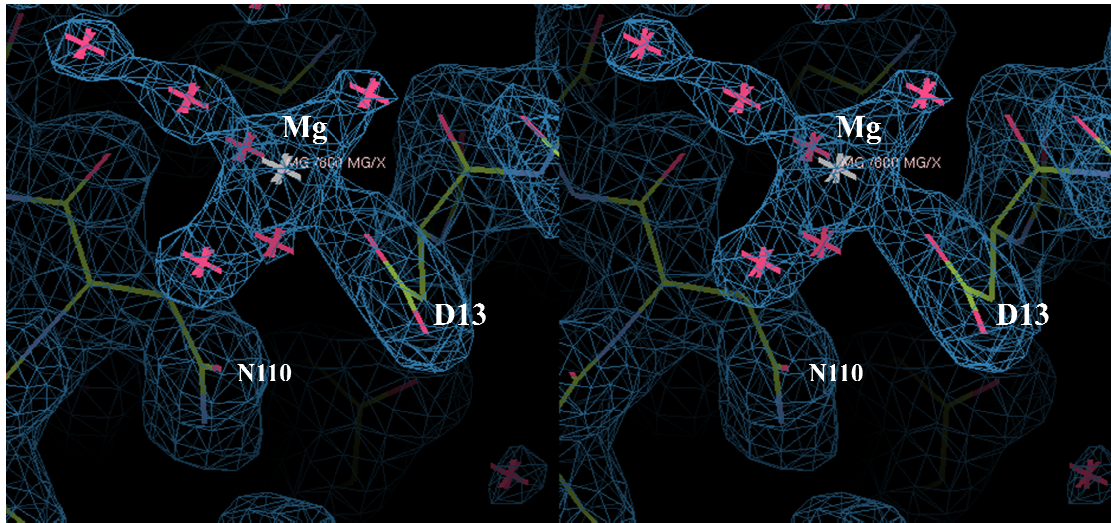

Figure S4

*Neisseria* HU (C-His6) ( $\mu\text{M}$ ) 0 1 2 4

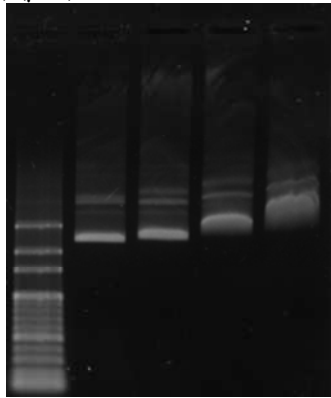

DNA substrate concentration: 2.5 nM

Figure S5

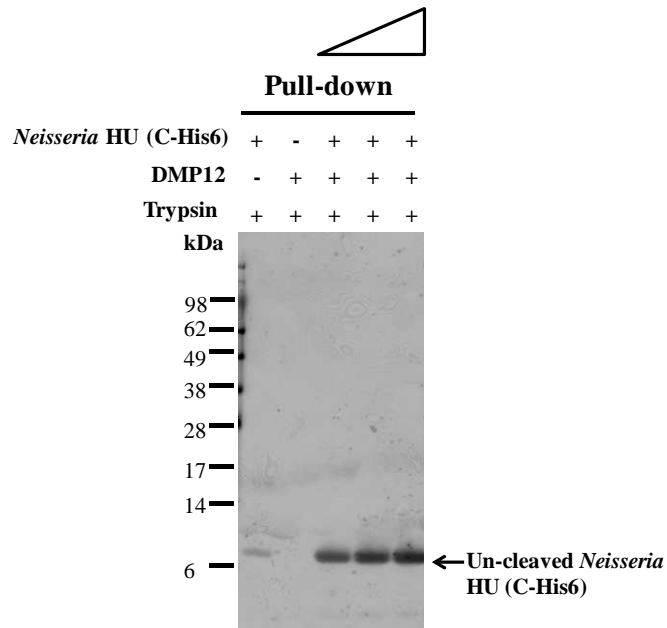

Figure S6

Figure S7 (A)

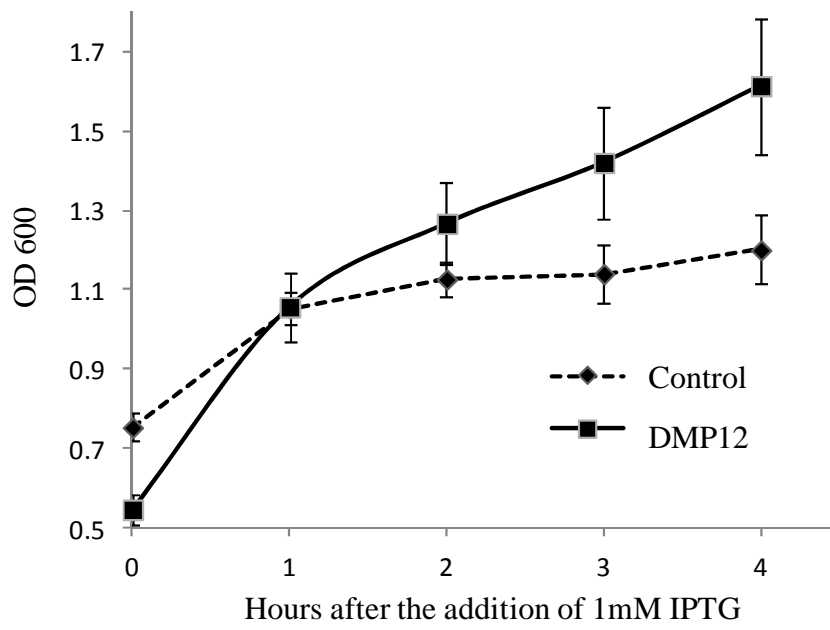

Figure S7 (B)

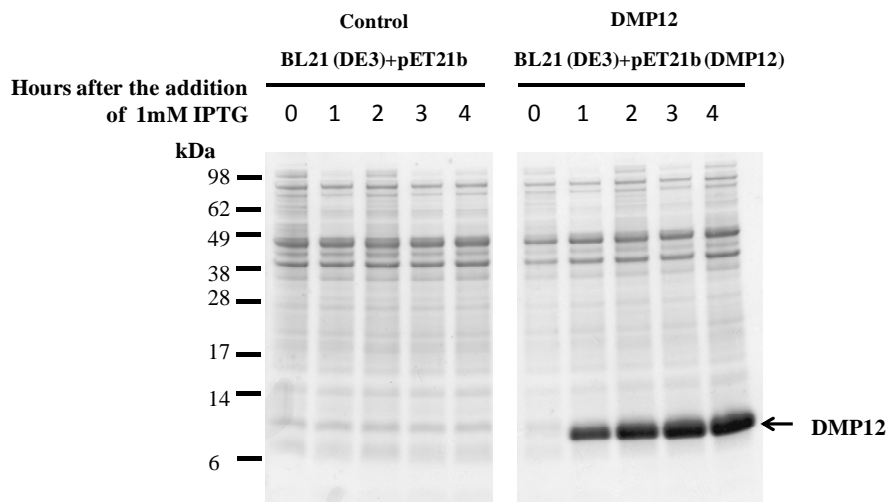

Figure S7

Figure S8 (A)

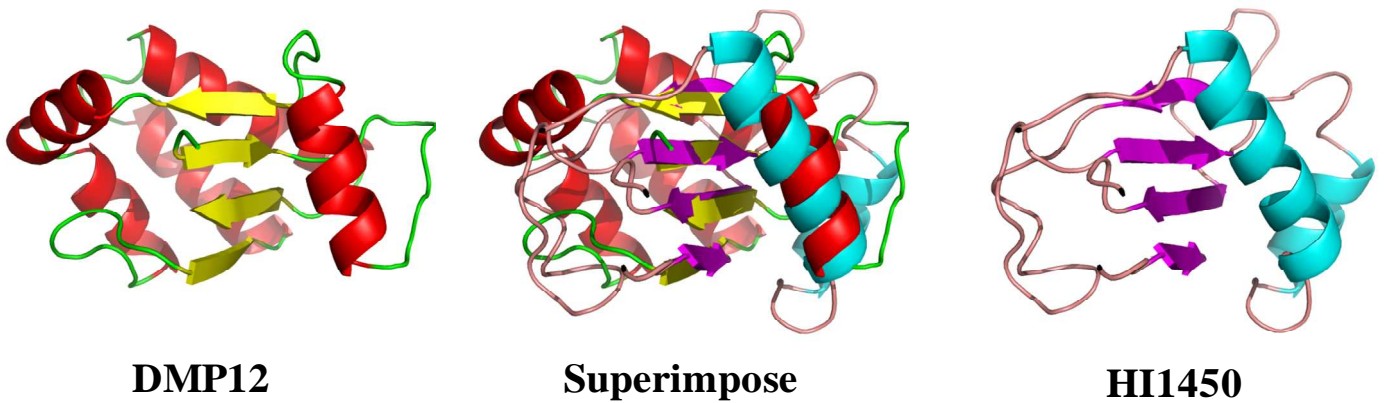

Figure S8 (B)

|                                                 |     |            |          |         |         |              |
|-------------------------------------------------|-----|------------|----------|---------|---------|--------------|
|                                                 |     | 10         | 20       | 30      | 40      | 50           |
| HI1450 ( <i>Haemophilus influenzae</i> )        | 1   | -MTTEIKKLD | PDTAIDIA | YDIFLEM | AGENLDP | ADILLFNLQFEE |
| HI1450 homolog ( <i>Pasteurella multocida</i> ) | 1   | --MTEITKLD | PDVAIDL  | AYDIFLE | MAPHLDP | ADILLFNLQFEE |
| HI1450 homolog ( <i>Vibrio splendidus</i> )     | 1   | -MTEANDL   | MSYDDA   | IDTAYD  | I FLEM  | APDNLEPAD    |
| HI1450 homolog ( <i>Vibrio cholerae</i> )       | 1   | ----MAEL   | ISIDDT   | IDTAYD  | I FLEM  | APDNLEPAD    |
| HI1450 homolog ( <i>Escherichia coli</i> )      | 1   | MDMDL      | NHRLTE   | DETELE  | QAYDIF  | LELAADN      |
| Consensus                                       |     | :          | *:::     | *:::    | *:::    | *:::         |
|                                                 |     | 60         | 70       | 80      | 90      | 100          |
| HI1450 ( <i>Haemophilus influenzae</i> )        | 50  | VETADDW    | EEI      | IGVLI   | DPEEY   | AEVWV        |
| HI1450 homolog ( <i>Pasteurella multocida</i> ) | 49  | VETADDW    | EEM      | IGVLI   | DPEEY   | AEVWV        |
| HI1450 homolog ( <i>Vibrio splendidus</i> )     | 50  | VETGDDW    | VEH      | VGF     | VDKEI   | IYAEV        |
| HI1450 homolog ( <i>Vibrio cholerae</i> )       | 47  | VDVGDDW    | DDQ      | VGF     | VDKEI   | IYAEV        |
| HI1450 homolog ( <i>Escherichia coli</i> )      | 51  | FEP        | AEDWQ    | EHVD    | FDLNP   | DFFAE        |
| Consensus                                       | 32  | :          | :::      | :::     | :::     | :::          |
|                                                 |     | 110        |          |         |         |              |
| HI1450 ( <i>Haemophilus influenzae</i> )        | 99  | REFHVI     | WKK      | -       |         |              |
| HI1450 homolog ( <i>Pasteurella multocida</i> ) | 98  | REFHVV     | WKK      | -       |         |              |
| HI1450 homolog ( <i>Vibrio splendidus</i> )     | 100 | KFCH       | ILW      | KRD     |         |              |
| HI1450 homolog ( <i>Vibrio cholerae</i> )       | 97  | KFCH       | MLW      | KRD     |         |              |
| HI1450 homolog ( <i>Escherichia coli</i> )      | 101 | KLCH       | I        | WRE     | -       |              |
| Consensus                                       | 61  | :          | :::      | :::     |         |              |

Figure S8 (C)

|                                                                        |     |       |       |       |      |        |
|------------------------------------------------------------------------|-----|-------|-------|-------|------|--------|
|                                                                        |     | 10    | 20    | 30    | 40   | 50     |
| DMP12 ( <i>Neisseria meningitidis</i> MC58)                            | 1   | -MNEH | NLLIF | CLKDN | VSI  | SEYTEM |
| conserved hypothetical protein ( <i>Neisseria gonorrhoeae</i> PID332)  | 1   | -MNEH | NLLIF | CLKDN | VSI  | SEYTEM |
| hypothetical protein NgonD_00327 ( <i>Neisseria gonorrhoeae</i> DG118) | 1   | -MNEH | NLLIF | CLKDN | VSI  | SEYTEM |
| hypothetical protein ( <i>Neisseria lactamica</i> 020-06)              | 1   | -MNEH | NLLIF | CLKDN | VSI  | SEYTEM |
| hypothetical protein E9Q_09985 ( <i>Moraxella catarrhalis</i> BCI)     | 1   | MSN   | TRLYP | VFCLE | RNI  | EINDL  |
| Consensus                                                              |     | *     | :     | :::   | :::  | :::    |
|                                                                        |     | 60    | 70    | 80    | 90   | 100    |
| DMP12 ( <i>Neisseria meningitidis</i> MC58)                            | 50  | RGLW  | G     | LVSEI | T    | DNWLF  |
| conserved hypothetical protein ( <i>Neisseria gonorrhoeae</i> PID332)  | 50  | RGLW  | G     | LVSEI | T    | DNWLF  |
| hypothetical protein NgonD_00327 ( <i>Neisseria gonorrhoeae</i> DG118) | 50  | RGLW  | G     | LVSEI | T    | DNWLF  |
| hypothetical protein ( <i>Neisseria lactamica</i> 020-06)              | 50  | CGLW  | G     | LVSEI | T    | DNWLF  |
| hypothetical protein E9Q_09985 ( <i>Moraxella catarrhalis</i> BCI)     | 51  | TGLW  | G     | I     | SEET | DNWLF  |
| Consensus                                                              |     | *     | :::   | :::   | :::  | :::    |
|                                                                        |     | 110   |       |       |      |        |
| DMP12 ( <i>Neisseria meningitidis</i> MC58)                            | 100 | I     | I     | HVLE  | YAI  | KNEK   |
| conserved hypothetical protein ( <i>Neisseria gonorrhoeae</i> PID332)  | 100 | I     | I     | HVLE  | YAI  | KNEK   |
| hypothetical protein NgonD_00327 ( <i>Neisseria gonorrhoeae</i> DG118) | 100 | I     | I     | HVLE  | YAI  | KNEK   |
| hypothetical protein ( <i>Neisseria lactamica</i> 020-06)              | 100 | I     | I     | HVLE  | YAI  | KNEK   |
| hypothetical protein E9Q_09985 ( <i>Moraxella catarrhalis</i> BCI)     | 101 | I     | L     | F     | L    | DYAI   |
| Consensus                                                              | 63  | *     | :::   | :::   | :::  | :::    |

Figure S8
